# Supplementary material for: Target Trial Emulation Using Hospital-Based Observational Data: Demonstration and Application in COVID-19
Source: MDPI journal article supplement (doi:10.3390/life13030777), 2023-03-13
Supplement: s1 [file s1]

**Supplementary Material**

Martinuka O, von Cube M, Hazard D, Marateb HR, Mansourian M, Sami R, Hajian MR, Wolkewitz M. Target trial emulation using hospital-based observational data: Demonstration and application in COVID-19.

**Content**

**Supplementary Figure S1.** Study cohort and emulated target trial flowchart

**Supplementary Table S1.** STROBE checklist - Statistical Methods for Observational Data on Evaluating Treatment: Demonstration of target trial emulation and application in COVID-19

**Supplementary Table S2.** Baseline characteristics of patients hospitalized with COVID-19

**Supplementary Figure S2.** Balance in demographic and clinical characteristics for the emulated cohort based on standardized mean differences in the unweighted and weighted clone samples

**Supplementary Table S3.** Summary of the corresponding measures of interest taking the parametric approach and estimated weighted results at the end of follow-up (60 days)

**Supplementary Figure S3.** Effect on hospital length of stay in X-treated (A) and non-X-treated (B) patients

**Supplementary Figure S4.** Weighted cause-specific cumulative hazards estimated from the Nelson-Aalen estimator for in-hospital death (A) and discharged alive (B) outcomes

**Supplementary Figure S5.** Weighted cause-specific cumulative incidences estimated using the Aalen-Johansen estimator for in-hospital death (A) and discharged alive (B)

**Supplementary Figure S6.** Risk differences for in-hospital death and discharged alive outcomes over the follow-up period using the Aalen-Johansen approach

**Supplementary Table S4.** Summary results of the sensitivity analysis with one-day grace period at the end of follow-up (60 days)

**Supplementary Table S5.** Summary results of the sensitivity analysis with a grace period (of three days) at the end of follow-up (60 days)

**Supplementary Figure S7.** Kaplan-Meier estimates of the cumulative probability (%) of in-hospital death

**Supplementary Figure S1.** Study cohort and emulated target trial flowchart

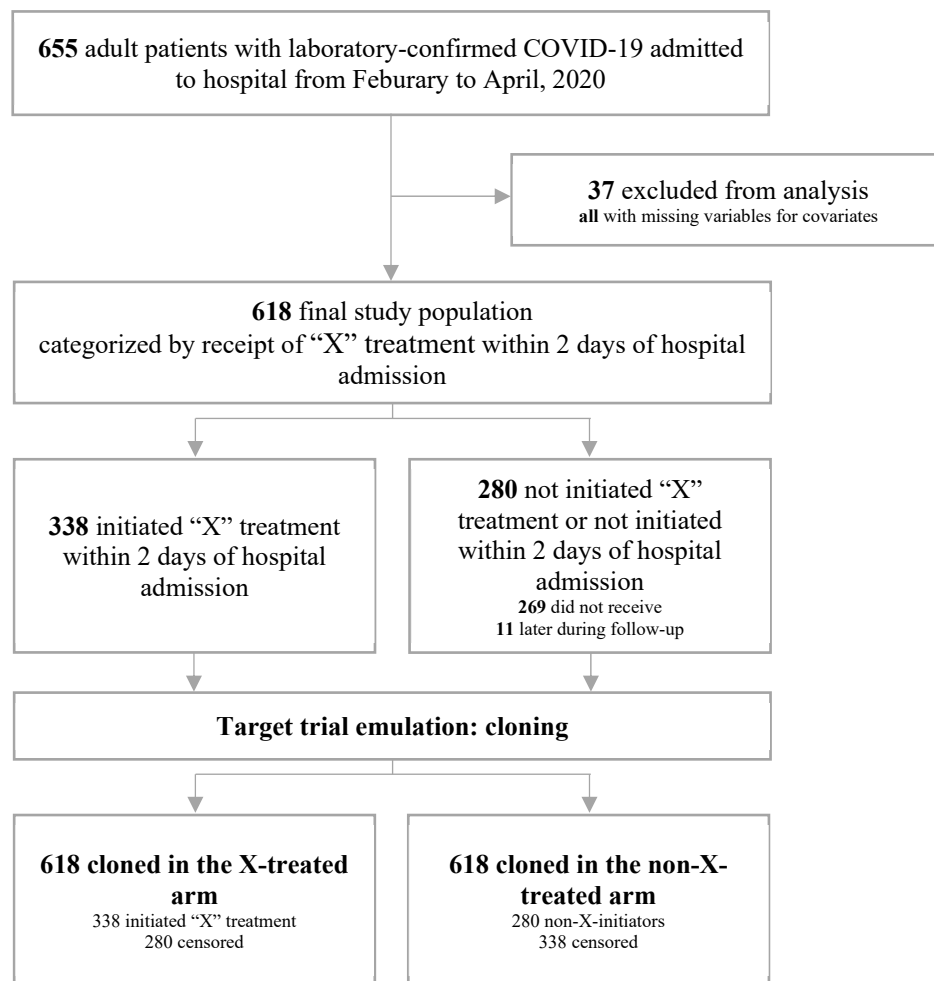

**Abbreviation:** COVID-19, Coronavirus disease 2019.

**Supplementary Table S1.** STROBE checklist - Statistical Methods for Observational Data on Evaluating Treatment: Demonstration of target trial emulation and application in COVID-19

|                              | Item No. | Recommendation                                                                                                                                                                       | Page No. |
|------------------------------|----------|--------------------------------------------------------------------------------------------------------------------------------------------------------------------------------------|----------|
| Title and abstract           | 1        | (a) Indicate the study’s design with a commonly used term in the title or the abstract                                                                                               | 1        |
|                              |          | (b) Provide in the abstract an informative and balanced summary of what was done and what was found                                                                                  | 1        |
| Introduction                 |          |                                                                                                                                                                                      |          |
| Background/rationale         | 2        | Explain the scientific background and rationale for the investigation being reported                                                                                                 | 2        |
| Objectives                   | 3        | State specific objectives, including any prespecified hypotheses                                                                                                                     | 2        |
| Methods                      |          |                                                                                                                                                                                      |          |
| Study design                 | 4        | Present key elements of study design early in the paper                                                                                                                              | 2        |
| Setting                      | 5        | Describe the setting, locations, and relevant dates, including periods of recruitment, exposure, follow-up, and data collection                                                      | 3-4      |
| Participants                 | 6        | Give the eligibility criteria, and the sources and methods of selection of participants. Describe methods of follow-up                                                               | 3-4      |
| Variables                    | 7        | Clearly define all outcomes, exposures, predictors, potential confounders, and effect modifiers. Give diagnostic criteria, if applicable                                             | 3,6      |
| Data sources/<br>measurement | 8        | For each variable of interest, give sources of data and details of methods of assessment (measurement). Describe comparability of assessment methods if there is more than one group | NA       |
| Bias                         | 9        | Describe any efforts to address potential sources of bias                                                                                                                            | 3-7      |
| Study size                   | 10       | Explain how the study size was arrived at                                                                                                                                            | NA       |
| Quantitative variables       | 11       | Explain how quantitative variables were handled in the analyses. If applicable, describe which groupings were chosen and why                                                         | NA       |
| Statistical methods          | 12       | (a) Describe all statistical methods, including those used to control for confounding                                                                                                | 4-8      |
|                              |          | (b) Describe any methods used to examine subgroups and interactions                                                                                                                  | NA       |
|                              |          | (c) Explain how missing data were addressed                                                                                                                                          | NA       |
|                              |          | (d) Cohort study—If applicable, explain how loss to follow-up was addressed                                                                                                          | NA       |
|                              |          | (e) Describe any sensitivity analyses                                                                                                                                                | 8        |

*Continued on next page*

|                          |    |                                                                                                                                                                                                              |                           |
|--------------------------|----|--------------------------------------------------------------------------------------------------------------------------------------------------------------------------------------------------------------|---------------------------|
| <b>Results</b>           |    |                                                                                                                                                                                                              |                           |
| Participants             | 13 | (a) Report numbers of individuals at each stage of study—eg numbers potentially eligible, examined for eligibility, confirmed eligible, included in the study, completing follow-up, and analysed            | Figure S1                 |
|                          |    | (b) Give reasons for non-participation at each stage                                                                                                                                                         | Figure S1                 |
|                          |    | (c) Consider use of a flow diagram                                                                                                                                                                           | Figure S1                 |
| Descriptive data         | 14 | (a) Give characteristics of study participants (eg demographic, clinical, social) and information on exposures and potential confounders                                                                     | Table S2                  |
|                          |    | (b) Indicate number of participants with missing data for each variable of interest                                                                                                                          | NA                        |
|                          |    | (c) Summarise follow-up time (eg, average and total amount)                                                                                                                                                  | 9                         |
| Outcome data             | 15 | Report numbers of outcome events or summary measures over time                                                                                                                                               | 8-9                       |
| Main results             | 16 | (a) Give unadjusted estimates and, if applicable, confounder-adjusted estimates and their precision (eg, 95% confidence interval). Make clear which confounders were adjusted for and why they were included | Table S3                  |
|                          |    | (b) Report category boundaries when continuous variables were categorized                                                                                                                                    | Table S2                  |
|                          |    | (c) If relevant, consider translating estimates of relative risk into absolute risk for a meaningful time period                                                                                             | 9, Table S3, Figure 3, S3 |
| Other analyses           | 17 | Report other analyses done—eg analyses of subgroups and interactions, and sensitivity analyses                                                                                                               | 10, Table S4-S5           |
| <b>Discussion</b>        |    |                                                                                                                                                                                                              |                           |
| Key results              | 18 | Summarise key results with reference to study objectives                                                                                                                                                     | 10-11                     |
| Limitations              | 19 | Discuss limitations of the study, taking into account sources of potential bias or imprecision. Discuss both direction and magnitude of any potential bias                                                   | 11                        |
| Interpretation           | 20 | Give a cautious overall interpretation of results considering objectives, limitations, multiplicity of analyses, results from similar studies, and other relevant evidence                                   | 10-11                     |
| Generalisability         | 21 | Discuss the generalisability (external validity) of the study results                                                                                                                                        | NA                        |
| <b>Other information</b> |    |                                                                                                                                                                                                              |                           |
| Funding                  | 22 | Give the source of funding and the role of the funders for the present study and, if applicable, for the original study on which the present article is based                                                | 12                        |

**Supplementary Table S2.** Baseline characteristics of patients hospitalized with COVID-19

| Characteristic                               | n                 |
|----------------------------------------------|-------------------|
| <b>Overall sample</b>                        | 618               |
| <b>Gender</b>                                |                   |
| Male                                         | 384 (62.1 %)      |
| Female                                       | 234 (37.9 %)      |
| <b>Age, years</b>                            |                   |
| Mean (SD)                                    | 57.2              |
| Median [Min, Max]                            | 58.0 [20.0, 92.0] |
| <b>O2 saturation [%]</b>                     |                   |
| Mean (SD)                                    | 89 (7.2)          |
| Median [Min, Max]                            | 91 [35, 100]      |
| <b>Respiratory rate [breaths per minute]</b> |                   |
| Mean (SD)                                    | 21.9 (5.2)        |
| Median [Min, Max]                            | 20 [12, 45]       |
| <b>Creatinine [mg/dL]</b>                    |                   |
| Mean (SD)                                    | 1.20 (1.02)       |
| Median [Min, Max]                            | 0.96 [0.41, 9.89] |

**Abbreviation:** SD, standard deviation.

**Supplementary Figure S2.** Balance in demographic and clinical characteristics for the emulated cohort based on standardized mean differences in the unweighted and weighted clone samples

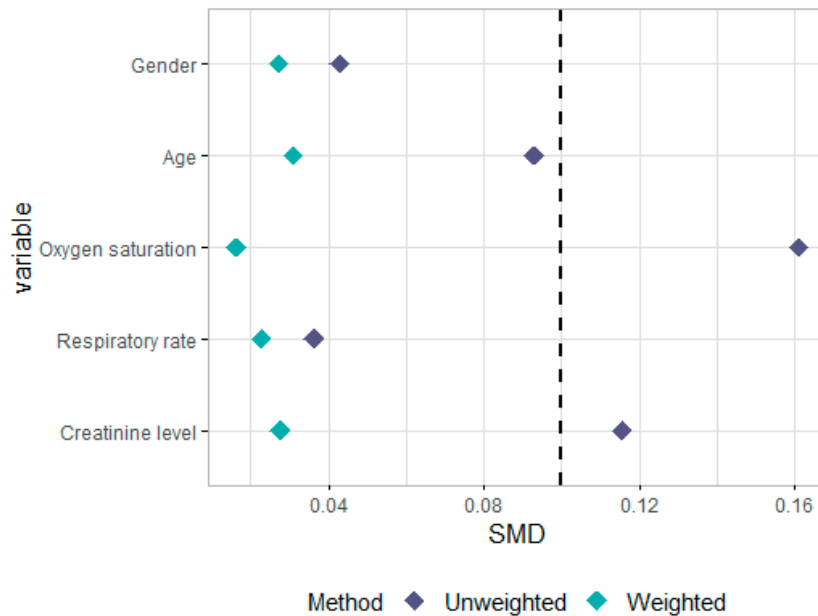

Notes: SMD < 0.1: adequate balance, 0.1-0.25: irrelevant imbalance, >0.25 serious imbalance<sup>1</sup>.

Abbreviation: SMD, standardized mean difference.

The standardized differences were examined to ensure that the weights eliminated any imbalance between treatment arms. [1] A threshold below 10% of the standardized mean differences is considered a meaningful balance. [2]

## References

1. Willems, S.; Schat, A.; van Noorden, M.S.; Fiocco, M. Correcting for dependent censoring in routine outcome monitoring data by applying the inverse probability censoring weighted estimator. *Stat. Methods Med. Res.* 2018, 27, 323–335, doi:10.1177/0962280216628900.
2. Stuart, E.A.; Lee, B.K.; Leacy, F.P. Prognostic score-based balance measures can be a useful diagnostic for propensity score methods in comparative effectiveness research. *J. Clin. Epidemiol.* 2013, 66, S84-S90.e1, doi:10.1016/j.jclinepi.2013.01.013.

**Supplementary Table S3.** Summary of the corresponding measures of interest taking the parametric approach and estimated weighted results at the end of follow-up (60 days)

| Corresponding measure                                                                    | Mathematical formulation                                                                        | Results<br>[95% CI]       |
|------------------------------------------------------------------------------------------|-------------------------------------------------------------------------------------------------|---------------------------|
| <b>Constant hazards</b>                                                                  |                                                                                                 |                           |
| Death hazard w/o treatment                                                               | $\lambda_{02}$                                                                                  | 0.010                     |
| Discharge hazard w/o treatment                                                           | $\lambda_{03}$                                                                                  | 0.120                     |
| Hazard w/o treatment                                                                     | $\lambda_0 = \lambda_{02} + \lambda_{03}$                                                       | 0.130                     |
| Death hazard with treatment                                                              | $\lambda_{12}$                                                                                  | 0.008                     |
| Discharge hazard with treatment                                                          | $\lambda_{13}$                                                                                  | 0.124                     |
| Hazard with treatment                                                                    | $\lambda_1 = \lambda_{12} + \lambda_{13}$                                                       | 0.131                     |
| <b>Mortality</b>                                                                         |                                                                                                 |                           |
| Mortality risk w/o treatment at day 60                                                   | $MR_0 = \frac{\lambda_{02}}{\lambda_{02} + \lambda_{03}}$                                       | 0.074<br>[0.031-0.085]    |
| Mortality risk with treatment at day 60                                                  | $MR_1 = \frac{\lambda_{12}}{\lambda_{12} + \lambda_{13}}$                                       | 0.058<br>[0.037-0.076]    |
| Mortality risk ratio at day 60                                                           | $\frac{\lambda_{12}/\lambda_{02}}{(\lambda_{13} + \lambda_{12})/(\lambda_{02} + \lambda_{03})}$ | 0.785<br>[0.535-1.316]    |
| Difference in mortality at day 60                                                        | $MR_1 - MR_0$                                                                                   | -0.016<br>[-0.033, 0.030] |
| <b>Occurrence of outcome and treatment effect estimands</b>                              |                                                                                                 |                           |
| Hazard ratio of death (treatment <i>vs.</i> w/o treatment)                               | $HR_2 = \frac{\lambda_{12}}{\lambda_{02}}$                                                      | 0.793<br>[0.480-1.247]    |
| Hazard ratio of discharge (treatment <i>vs.</i> w/o treatment)                           | $HR_3 = \frac{\lambda_{13}}{\lambda_{03}}$                                                      | 1.027<br>[0.806-1.045]    |
| Differences in hazard ratios of death (treatment <i>vs.</i> w/o treatment) at day 60     | $\lambda_{12} - \lambda_{02}$                                                                   | -0.002<br>[-0.005, 0.003] |
| Differences in hazard ratios of discharge (treatment <i>vs.</i> w/o treatment) at day 60 | $\lambda_{13} - \lambda_{03}$                                                                   | 0.003<br>[-0.023, 0.005]  |
| Cumulative risk of death w/o treatment at time t                                         | $CIF_{02} = \frac{\lambda_{02}}{\lambda_0} \times (1 - \exp(-\lambda_0 t))$                     | 0.074<br>[0.031-0.085]    |
| Cumulative risk of discharge w/o treatment at time t                                     | $CIF_{03} = \frac{\lambda_{03}}{\lambda_0} \times (1 - \exp(-\lambda_0 t))$                     | 0.924<br>[0.913-0.968]    |
| Cumulative risk of death with treatment at time t                                        | $CIF_{12} = \frac{\lambda_{12}}{\lambda_1} \times (1 - \exp(-\lambda_1 t))$                     | 0.058<br>[0.037-0.076]    |
| Cumulative risk of discharge with treatment at time t                                    | $CIF_{13} = \frac{\lambda_{13}}{\lambda_1} \times (1 - \exp(-\lambda_1 t))$                     | 0.940<br>[0.921-0.961]    |
| Risk difference functions for death at day 60                                            | $RD_2 = CIF_{12} - CIF_{02}$                                                                    | -0.016<br>[-0.033, 0.030] |
| Risk difference functions for discharge at day 60                                        | $RD_3 = CIF_{13} - CIF_{03}$                                                                    | 0.016<br>[-0.031, 0.032]  |
| Risk ratios for death at day 60                                                          | $RR_2 = \frac{CIF_{12}}{CIF_{02}}$                                                              | 0.785<br>[0.053, 1.309]   |

*Continued on next page*

| Corresponding measure               | Mathematical formulation                        | Results                   |
|-------------------------------------|-------------------------------------------------|---------------------------|
| Risk ratios for discharge at day 60 | $RR_3 = \frac{CIF_{13}}{CIF_{03}}$              | 1.017<br>[0.965, 1.035]   |
| <b>Length of stay</b>               |                                                 |                           |
| Length of stay w/o treatment        | $LOS_0 = \frac{1}{\lambda_{02} + \lambda_{03}}$ | 7.69 days<br>[7.00, 8.39] |
| Length of stay with treatment       | $LOS_1 = \frac{1}{\lambda_{12} + \lambda_{13}}$ | 7.61 days<br>[7.21, 8.03] |
| Difference in length of stay        | $LOS_1 - LOS_0$                                 | -0.08                     |

Notes: 0 = from non-X-treated state, 1 = from X-treated state.

Abbreviations: CIF, cumulative incidence function; HR, hazard ratio; LOS, length of stay; MR, mortality risk, RD, risk difference; RR, risk ratio; w/o, without.



**Supplementary Figure S3.** Effect on hospital length of stay in X-treated (A) and non-X-treated (B) patients

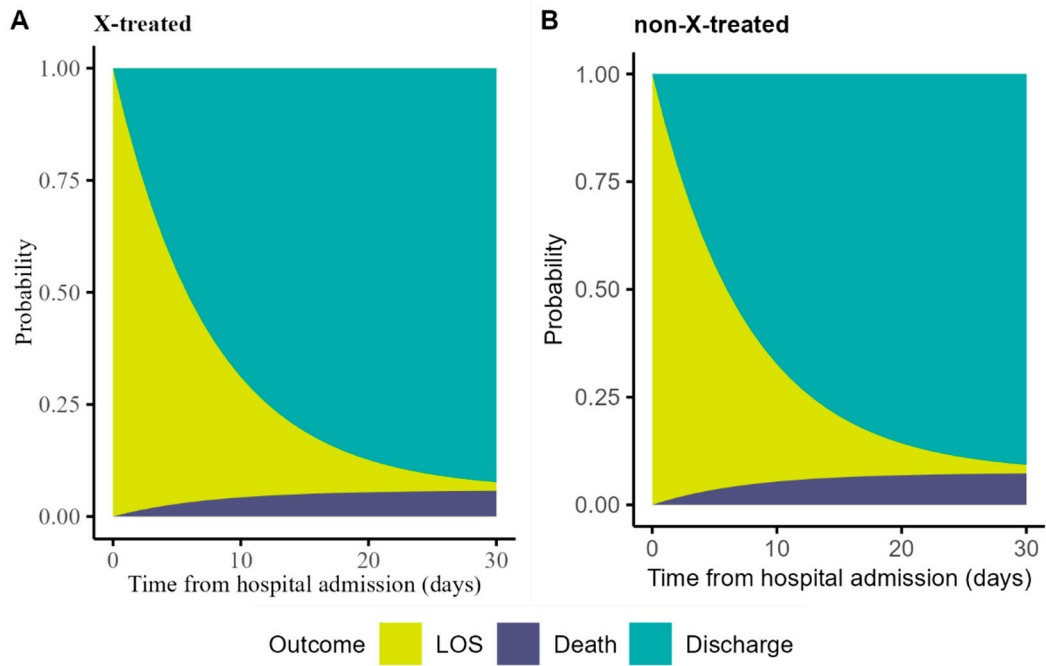

Abbreviation: LOS, length of stay.

**Results from the additional analyses**

**Supplementary Figure S4.** Weighted cause-specific cumulative hazards estimated from the Nelson-Aalen estimator for in-hospital death (A) and discharged alive (B) outcomes

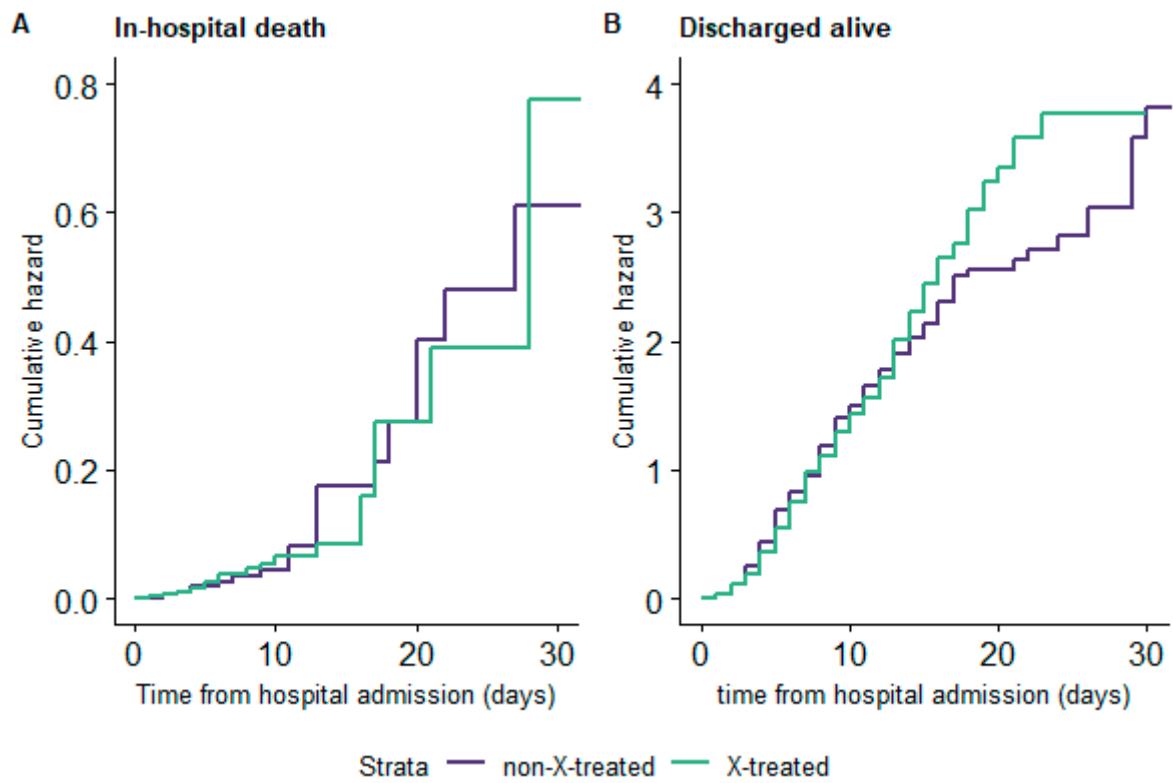

**Supplementary Figure S5.** Weighted cause-specific cumulative incidences estimated using the Aalen-Johansen estimator for in-hospital death (A) and discharged alive (B)

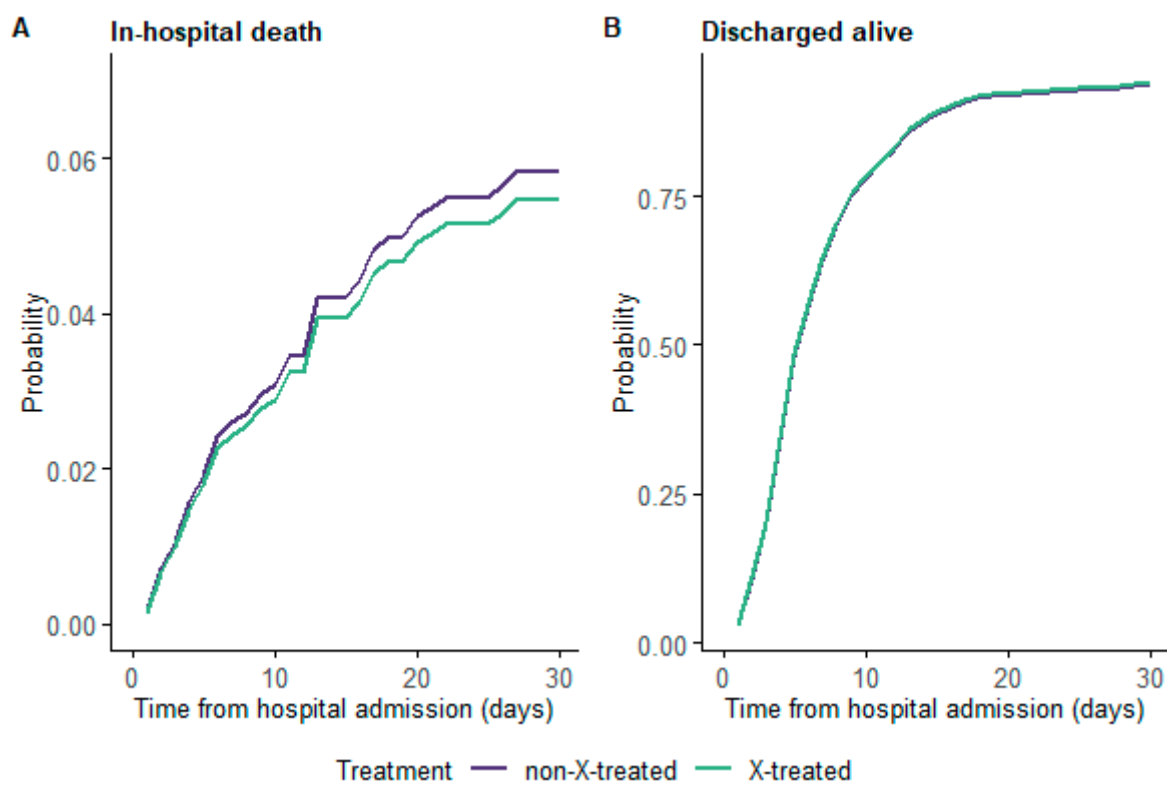

**Supplementary Figure S6.** Risk differences for in-hospital death and discharged alive outcomes over the follow-up period using the Aalen-Johansen approach

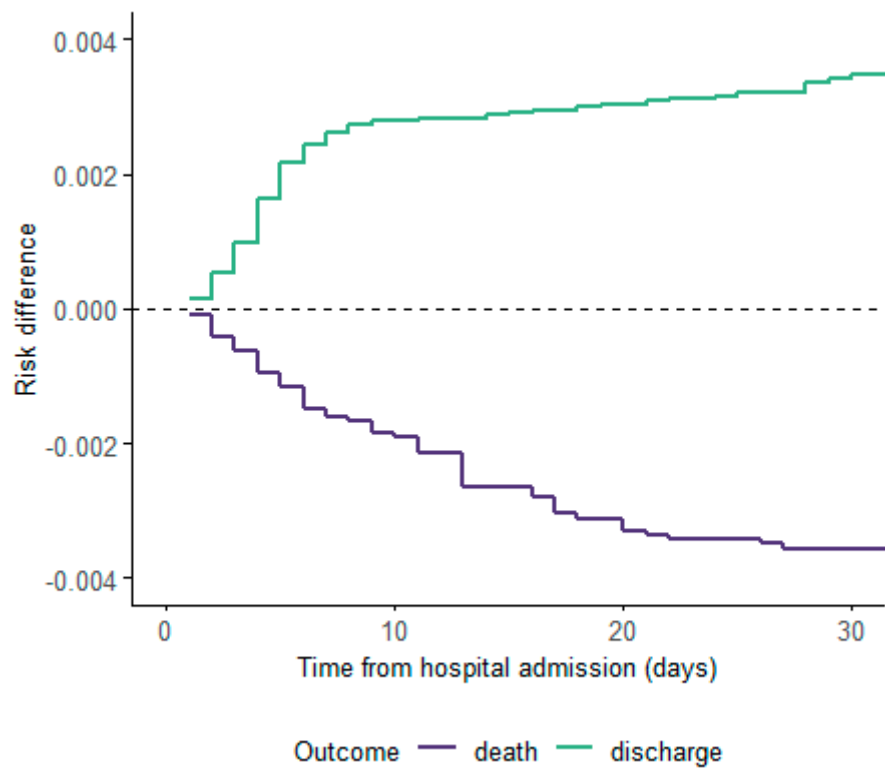

**Supplementary Table S4.** Summary results of the sensitivity analysis with one-day grace period at the end of follow-up (60 days)

| Corresponding measure                                                                    | Mathematical formulation                                                                        | Results<br>[95% CI]       |
|------------------------------------------------------------------------------------------|-------------------------------------------------------------------------------------------------|---------------------------|
| <b>Constant hazards</b>                                                                  |                                                                                                 |                           |
| Death hazard w/o treatment                                                               | $\lambda_{02}$                                                                                  | 0.010                     |
| Discharge hazard w/o treatment                                                           | $\lambda_{03}$                                                                                  | 0.121                     |
| Hazard w/o treatment                                                                     | $\lambda_0 = \lambda_{02} + \lambda_{03}$                                                       | 0.130                     |
| Death hazard with treatment                                                              | $\lambda_{12}$                                                                                  | 0.007                     |
| Discharge hazard with treatment                                                          | $\lambda_{13}$                                                                                  | 0.124                     |
| Hazard with treatment                                                                    | $\lambda_1 = \lambda_{12} + \lambda_{13}$                                                       | 0.131                     |
| <b>Mortality</b>                                                                         |                                                                                                 |                           |
| Mortality risk w/o treatment at day 60                                                   | $MR_0 = \frac{\lambda_{02}}{\lambda_{02} + \lambda_{03}}$                                       | 0.074<br>[0.031-0.085]    |
| Mortality risk with treatment at day 60                                                  | $MR_1 = \frac{\lambda_{12}}{\lambda_{12} + \lambda_{13}}$                                       | 0.055<br>[0.029-0.068]    |
| Mortality risk ratio at day 60                                                           | $\frac{\lambda_{12}/\lambda_{02}}{(\lambda_{13} + \lambda_{12})/(\lambda_{02} + \lambda_{03})}$ | 0.750<br>[0.411-1.197]    |
| Difference in mortality at day 60                                                        | $MR_1 - MR_0$                                                                                   | -0.018<br>[-0.041-0.023]  |
| <b>Occurrence of outcome and treatment effect estimands</b>                              |                                                                                                 |                           |
| Hazard ratio of death (treatment <i>vs.</i> w/o treatment)                               | $HR_2 = \frac{\lambda_{12}}{\lambda_{02}}$                                                      | 0.754<br>[0.352-1.125]    |
| Hazard ratio of discharge (treatment <i>vs.</i> w/o treatment)                           | $HR_3 = \frac{\lambda_{13}}{\lambda_{03}}$                                                      | 1.025<br>[0.801-1.042]    |
| Differences in hazard ratios of death (treatment <i>vs.</i> w/o treatment) at day 60     | $\lambda_{12} - \lambda_{02}$                                                                   | -0.002<br>[-0.006, 0.002] |
| Differences in hazard ratios of discharge (treatment <i>vs.</i> w/o treatment) at day 60 | $\lambda_{13} - \lambda_{03}$                                                                   | 0.003<br>[-0.024, 0.005]  |
| Cumulative risk of death w/o treatment at time t                                         | $CIF_{02} = \frac{\lambda_{02}}{\lambda_0} \times (1 - \exp(-\lambda_0 t))$                     | 0.073<br>[0.031-0.085]    |
| Cumulative risk of discharge w/o treatment at time t                                     | $CIF_{03} = \frac{\lambda_{03}}{\lambda_0} \times (1 - \exp(-\lambda_0 t))$                     | 0.925<br>[0.913-0.968]    |
| Cumulative risk of death with treatment at time t                                        | $CIF_{12} = \frac{\lambda_{12}}{\lambda_1} \times (1 - \exp(-\lambda_1 t))$                     | 0.055<br>[0.029-0.068]    |
| Cumulative risk of discharge with treatment at time t                                    | $CIF_{13} = \frac{\lambda_{13}}{\lambda_1} \times (1 - \exp(-\lambda_1 t))$                     | 0.943<br>[0.929-0.968]    |
| Risk difference functions for death at day 60                                            | $RD_2 = CIF_{12} - CIF_{02}$                                                                    | -0.018<br>[-0.041, 0.023] |
| Risk difference functions for discharge at day 60                                        | $RD_3 = CIF_{13} - CIF_{03}$                                                                    | 0.018<br>[-0.024, 0.040]  |
| Risk ratios for death at day 60                                                          | $RR_2 = \frac{CIF_{12}}{CIF_{02}}$                                                              | 0.750<br>[0.041, 1.196]   |

*Continued on next page*

| Corresponding measure               | Mathematical formulation                        | Results                   |
|-------------------------------------|-------------------------------------------------|---------------------------|
| Risk ratios for discharge at day 60 | $RR_3 = \frac{CIF_{13}}{CIF_{03}}$              | 1.020<br>[0.973, 1.044]   |
| <b>Length of stay</b>               |                                                 |                           |
| Length of stay w/o treatment        | $LOS_0 = \frac{1}{\lambda_{02} + \lambda_{03}}$ | 7.66 days<br>[6.89, 8.31] |
| Length of stay with treatment       | $LOS_1 = \frac{1}{\lambda_{12} + \lambda_{13}}$ | 7.63 days<br>[7.84, 8.71] |
| Difference in length of stay        | $LOS_1 - LOS_0$                                 | -0.03                     |

Notes: 0 = from non-X-treated state, 1 = from X-treated state.

Abbreviations: CIF, cumulative incidence function; HR, hazard ratio; LOS, length of stay; MR, mortality risk, RD, risk difference; RR, risk ratio; w/o, without.

Mean of the weights 1.608 for the treated and 1.837 for the control group.

**Supplementary Table S5.** Summary results of the sensitivity analysis with a grace period (of three days) at the end of follow-up (60 days)

| Corresponding measure                                                                    | Mathematical formulation                                                                        | Results<br>[95% CI]       |
|------------------------------------------------------------------------------------------|-------------------------------------------------------------------------------------------------|---------------------------|
| <b>Constant hazards</b>                                                                  |                                                                                                 |                           |
| Death hazard w/o treatment                                                               | $\lambda_{02}$                                                                                  | 0.010                     |
| Discharge hazard w/o treatment                                                           | $\lambda_{03}$                                                                                  | 0.121                     |
| Hazard w/o treatment                                                                     | $\lambda_0 = \lambda_{02} + \lambda_{03}$                                                       | 0.131                     |
| Death hazard with treatment                                                              | $\lambda_{12}$                                                                                  | 0.007                     |
| Discharge hazard with treatment                                                          | $\lambda_{13}$                                                                                  | 0.124                     |
| Hazard with treatment                                                                    | $\lambda_1 = \lambda_{12} + \lambda_{13}$                                                       | 0.132                     |
| <b>Mortality</b>                                                                         |                                                                                                 |                           |
| Mortality risk w/o treatment at day 60                                                   | $MR_0 = \frac{\lambda_{02}}{\lambda_{02} + \lambda_{03}}$                                       | 0.076<br>[0.033-0.088]    |
| Mortality risk with treatment at day 60                                                  | $MR_1 = \frac{\lambda_{12}}{\lambda_{12} + \lambda_{13}}$                                       | 0.055<br>[0.034-0.070]    |
| Mortality risk ratio at day 60                                                           | $\frac{\lambda_{12}/\lambda_{02}}{(\lambda_{13} + \lambda_{12})/(\lambda_{02} + \lambda_{03})}$ | 0.728<br>[0.469-1.176]    |
| Difference in mortality at day 60                                                        | $MR_1 - MR_0$                                                                                   | -0.021<br>[-0.034, 0.022] |
| <b>Occurrence of outcome and treatment effect estimands</b>                              |                                                                                                 |                           |
| Hazard ratio of death (treatment <i>vs.</i> w/o treatment)                               | $HR_2 = \frac{\lambda_{12}}{\lambda_{02}}$                                                      | 0.730<br>[0.415-1.102]    |
| Hazard ratio of discharge (treatment <i>vs.</i> w/o treatment)                           | $HR_3 = \frac{\lambda_{13}}{\lambda_{03}}$                                                      | 1.026<br>[0.806-1.040]    |
| Differences in hazard ratios of death (treatment <i>vs.</i> w/o treatment) at day 60     | $\lambda_{12} - \lambda_{02}$                                                                   | -0.003<br>[-0.006, 0.002] |
| Differences in hazard ratios of discharge (treatment <i>vs.</i> w/o treatment) at day 60 | $\lambda_{13} - \lambda_{03}$                                                                   | 0.003<br>[-0.023, 0.005]  |
| Cumulative risk of death w/o treatment at time t                                         | $CIF_{02} = \frac{\lambda_{02}}{\lambda_0} \times (1 - \exp(-\lambda_0 t))$                     | 0.076<br>[0.033-0.088]    |
| Cumulative risk of discharge w/o treatment at time t                                     | $CIF_{03} = \frac{\lambda_{03}}{\lambda_0} \times (1 - \exp(-\lambda_0 t))$                     | 0.923<br>[0.910-0.966]    |
| Cumulative risk of death with treatment at time t                                        | $CIF_{12} = \frac{\lambda_{12}}{\lambda_1} \times (1 - \exp(-\lambda_1 t))$                     | 0.055<br>[0.034-0.070]    |
| Cumulative risk of discharge with treatment at time t                                    | $CIF_{13} = \frac{\lambda_{13}}{\lambda_1} \times (1 - \exp(-\lambda_1 t))$                     | 0.943<br>[0.927-0.964]    |
| Risk difference functions for death at day 60                                            | $RD_2 = CIF_{12} - CIF_{02}$                                                                    | -0.021<br>[-0.039, 0.022] |
| Risk difference functions for discharge at day 60                                        | $RD_3 = CIF_{13} - CIF_{03}$                                                                    | 0.021<br>[-0.024, 0.038]  |
| Risk ratios for death at day 60                                                          | $RR_2 = \frac{CIF_{12}}{CIF_{02}}$                                                              | 0.728<br>[0.047, 1.175]   |

Continued on next page

| Corresponding measure               | Mathematical formulation                        | Results                   |
|-------------------------------------|-------------------------------------------------|---------------------------|
| Risk ratios for discharge at day 60 | $RR_3 = \frac{CIF_{13}}{CIF_{03}}$              | 1.022<br>[0.973, 1.042]   |
| <b>Length of stay</b>               |                                                 |                           |
| Length of stay w/o treatment        | $LOS_0 = \frac{1}{\lambda_{02} + \lambda_{03}}$ | 7.62 days<br>[6.87, 8.30] |
| Length of stay with treatment       | $LOS_1 = \frac{1}{\lambda_{12} + \lambda_{13}}$ | 7.60 days<br>[7.84, 8.66] |
| Difference in length of stay        | $LOS_1 - LOS_0$                                 | -0.02                     |

Notes: 0 = from non-X-treated state, 1 = from X-treated state.

Abbreviations: CIF, cumulative incidence function; HR, hazard ratio; LOS, length of stay; MR, mortality risk, RD, risk difference; RR, risk ratio; w/o, without.

Mean of the weights 1.303 for the treated and 1.863 for the control group.



**Supplementary Figure S7.** Kaplan-Meier estimates of the cumulative probability (%) of in-hospital death

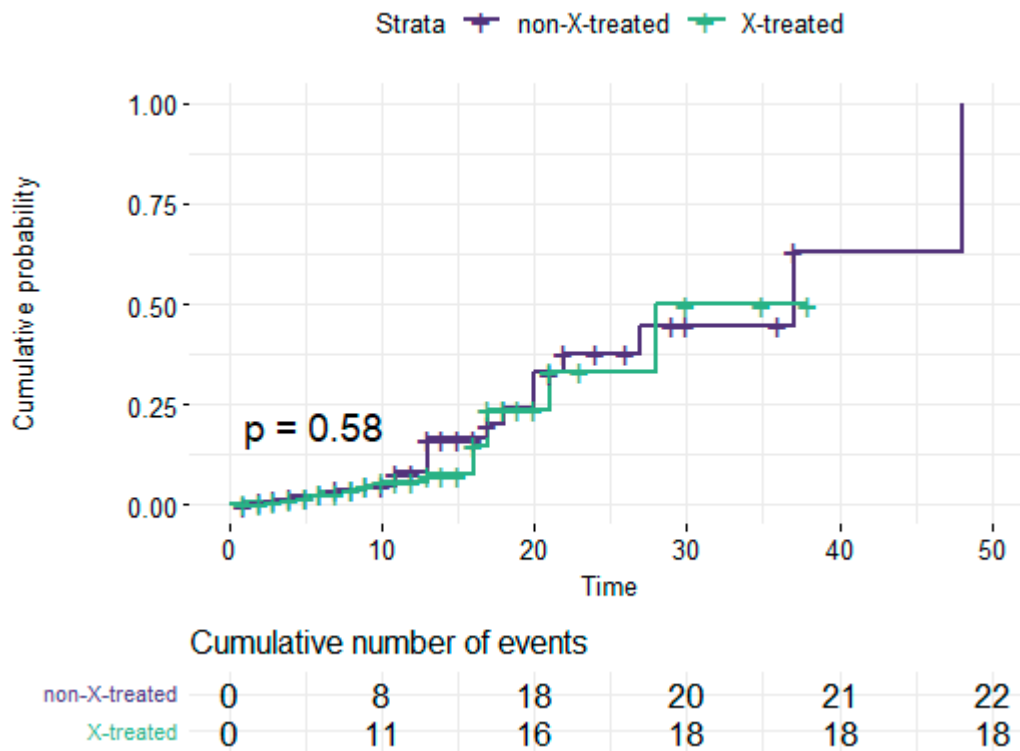

\*Using an immortal-time dataset, all treated patients were classified as treated from time zero

### The Kaplan-Meier analysis

We used the standard Kaplan-Meier survival analysis (that is, one minus survival function) to calculate the cumulative probability of in-hospital death over time. Competing risk bias was artificially introduced using the Kaplan-Meier method that treats all discharged events as right-censored.
